# Supplementary material for: Flipping chromosomes in deep-sea archaea
Source: PubMed Central journal article supplement (PMC5495485; doi:10.1371/journal.pgen.1006847), 2017-06-19

A

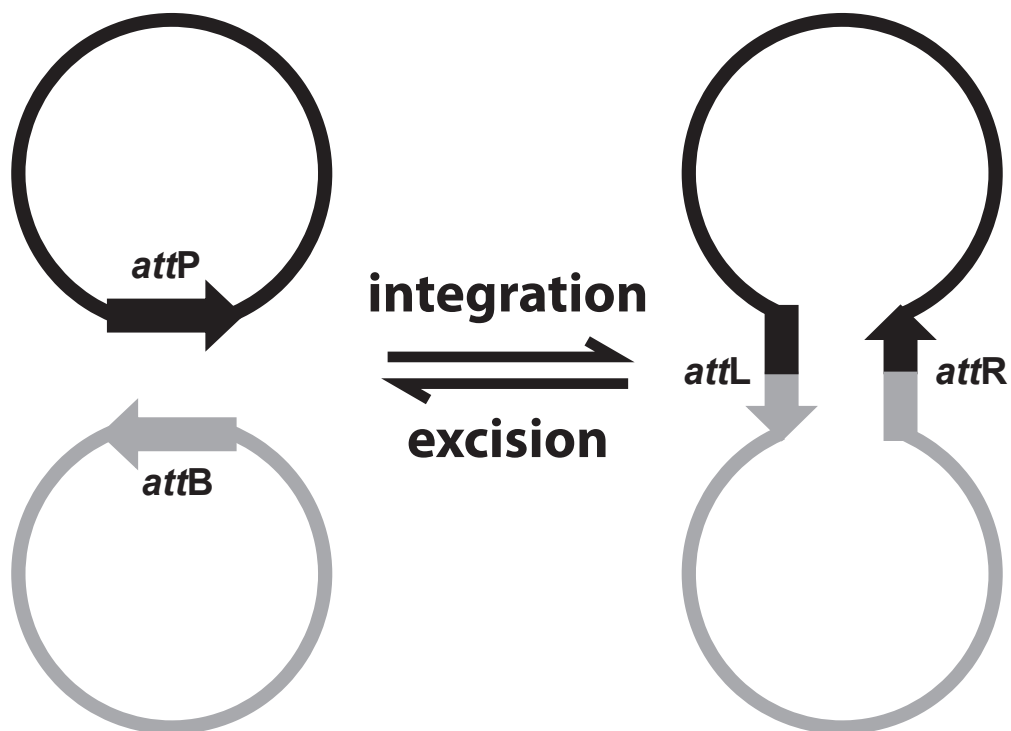

B

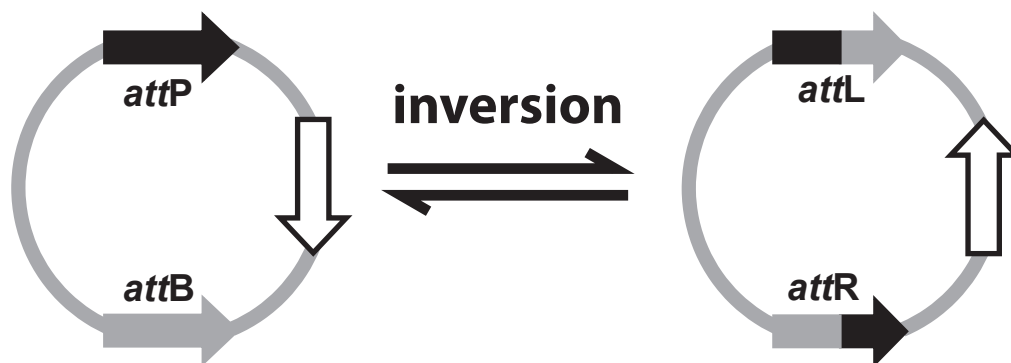

Supplement: pgen.1006847.s004.pdf [file pgen.1006847.s004.pdf]
