# Supplementary material for: Flipping chromosomes in deep-sea archaea
Source: PubMed Central journal article supplement (PMC5495485; doi:10.1371/journal.pgen.1006847), 2017-06-19
Supplement: pgen.1006847.s005.pdf [file pgen.1006847.s005.pdf]

A

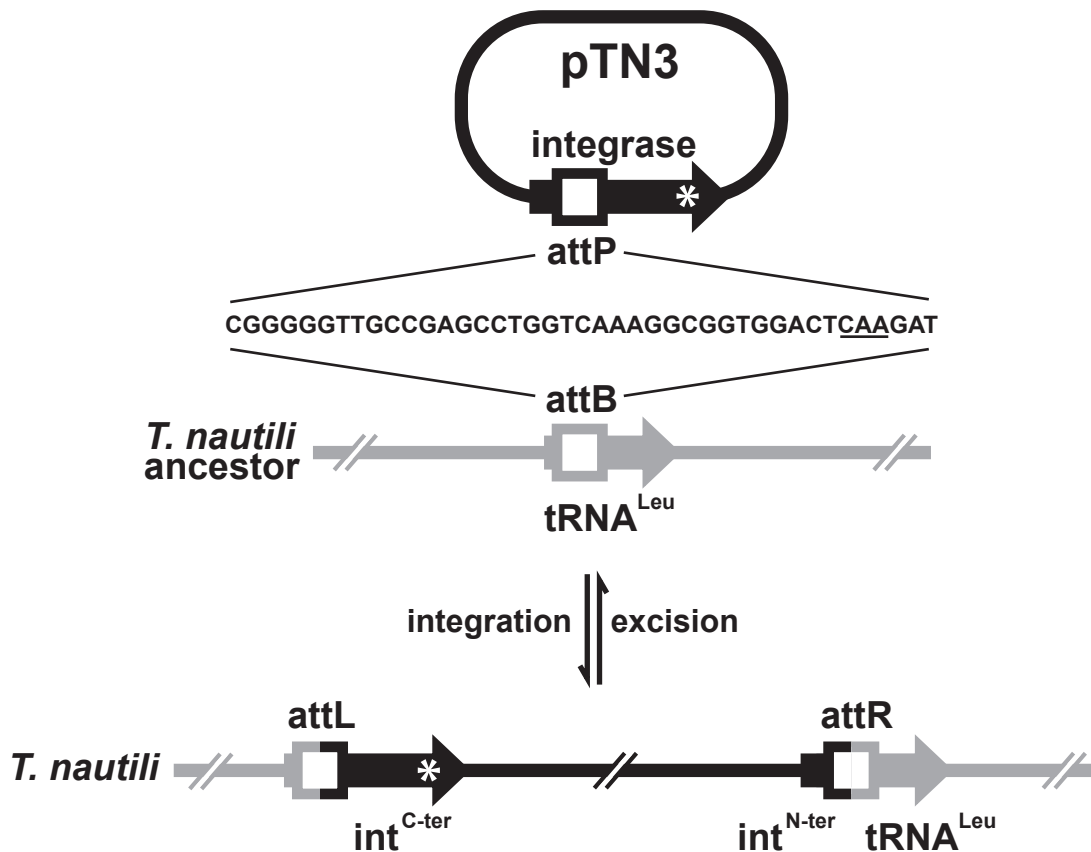

B

```

intpTN3                                     ATG3TAAAAATCGGGT
intpTN3 GGTGTGTACGTACTACTCCAAGCGACCGGAGAGGAGCAGGCCGGAGCGCGGAAGCGGAGGCGTCCGAGGCGCCTTCCCGCGTCTGT
intpTN3 ACATTACGCTACCGCCAGAAATCTATCGGAAGGCCAAGGAGCGCTGGGATAACGTGAGCCGAATCATCGCAAGCCTGCTTGAGGTGGC
intpTN3 TTTGGCTGAGGATTTAACGGTCGAGGAGGTCGTGACGGCCGTAAACGCTCCTTAGGAGTGGCGCTTTGGTGGTGAATTCGCCCTTCGAGC

attB
tRNALeu CGGGGGGTGGCCGAGCCTGGTCAAAGGCGGTGGACTCAAGATCCACTCCCGCAGGGGTTCCGGGGTTCAAATCCCGGCCCGCCACCA
*****
intpTN3 CGGGGGGTGGCCGAGCCTGGTCAAAGGCGGTGGACTCAAGATGCTCTTTTTTCCCGAATGAAGGCCTCTCCCGTCAGAACGACAACA

attP
intpTN3 AAGAAGAGCCGAGCGCCGATAACGTTTTTACAGGAAAGGCTTTGATAGACTCAACGGC AAAATCCACTATGGTCGTGATAGACAGAA
intpTN3 ATACATCGAATGGGTGAAACGGCGCACGCCAAGCATGGCCGACAAATACATTTCTCTGCTTGACAAGTACCTCTGGGGAAAGAAAGCC
intpTN3 AATACTCCAGAGGACCTCCGGCGCATTTGTAGAAGCTATCCCTCCCACGAGGGAGGCTTTCCTCAATAGGCATGCCTACATGGCGTTGA
intpTN3 GGAGCTACATTAACCTTCTTGTGGATAACGGAAAGCTGAGGAAGAGTGAAGCCATTGACTTCAAGGCCGTGATTCGGAACGTTAAGAC
intpTN3 CAACGCTCGCGCTGAATCCGCGAAGGTCATAACGGTTGAGGACATTCGTGAGATGTTCAACCAGCTCAAGGGGAAGAACGAGACGATT
intpTN3 CTCAGAGCGCGCAAGCTTACCTCAAGCTTCTCGCCTTTACAGGTCTCAGGGGAGACGAGGTCGCGAGCTGATGAACCAGTTTCGACC
intpTN3 CGAGGGTTATTGACGAGACATTC AAGGCCTTTGGCCTTCTGAGGAATACAAGGAGAAGATAGCGGCTATGATATGGAGCGGGTGAA
intpTN3 GATTAAGACGAGGAGGAGTCAAGCAAGCGTGGCTATGTCGCGGCTTTCCCGCTGAGCTCGTTCCTCCGAGCTGGAGTGGTTTCAGGAGC
intpTN3 ACTGGGTACAACTCACTGCGGACAACCTCTGATAAGCATAAGCTGTTCAAGGATTC AAGGAGTTAAGGACCTGGCCCTTGCTGAGAA
intpTN3 AGTTCTGGCAGAACTTCATGAACGACAATGTGATGAGCACGGTTCCAAACCTCCTGCTGATACCTGGCACCCTATTGAGTTCCCTCCA
intpTN3 GGGACGCGCTCCCAAAAACGTGGGTGGCAGGAATACCCTGGAACGTCAAAAACGCCGTGAGAATCTATTATTACATGGTGGACAAA
intpTN3 TTGAAAGAGGAGCTGGGGATTCTGGAGCTTAG

```
