# Supplementary material for: Flipping chromosomes in deep-sea archaea
Source: PubMed Central journal article supplement (PMC5495485; doi:10.1371/journal.pgen.1006847), 2017-06-19

**A**

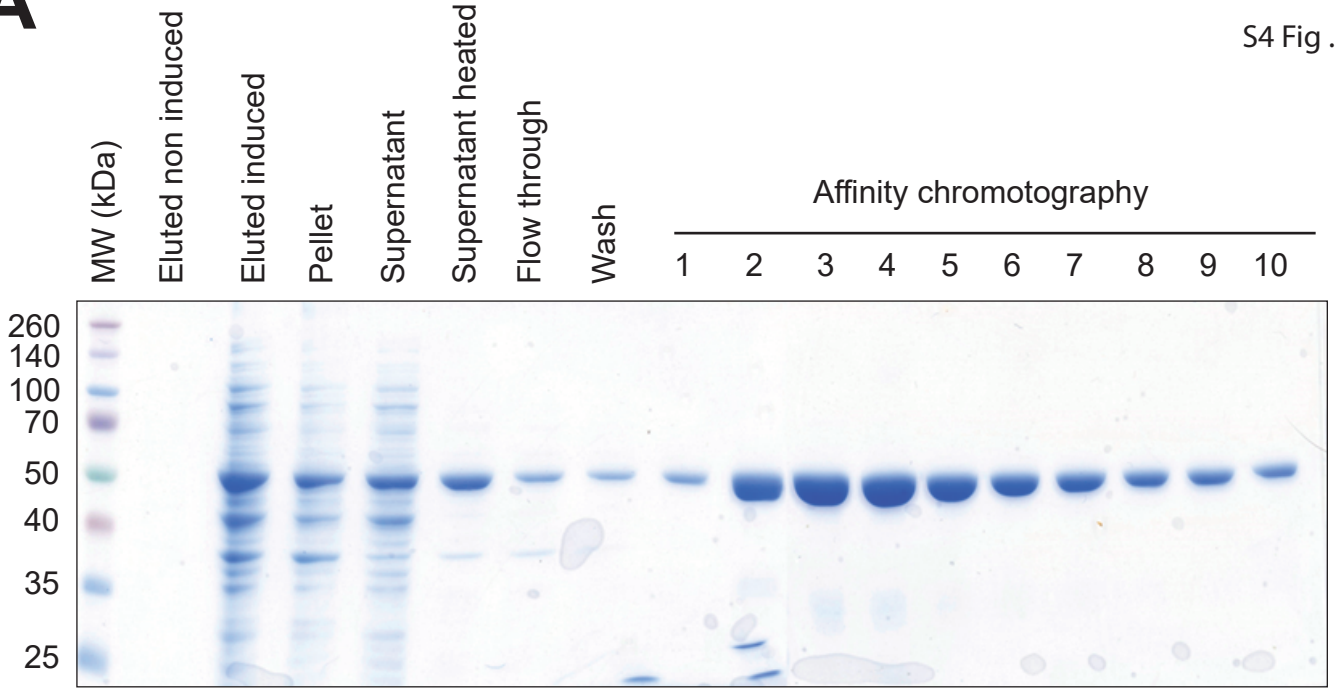

**B**

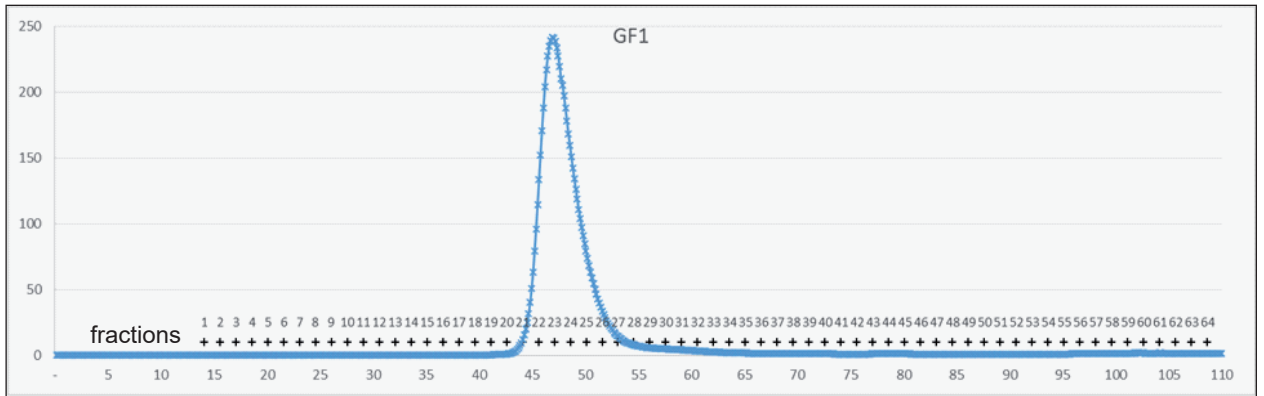

**C**

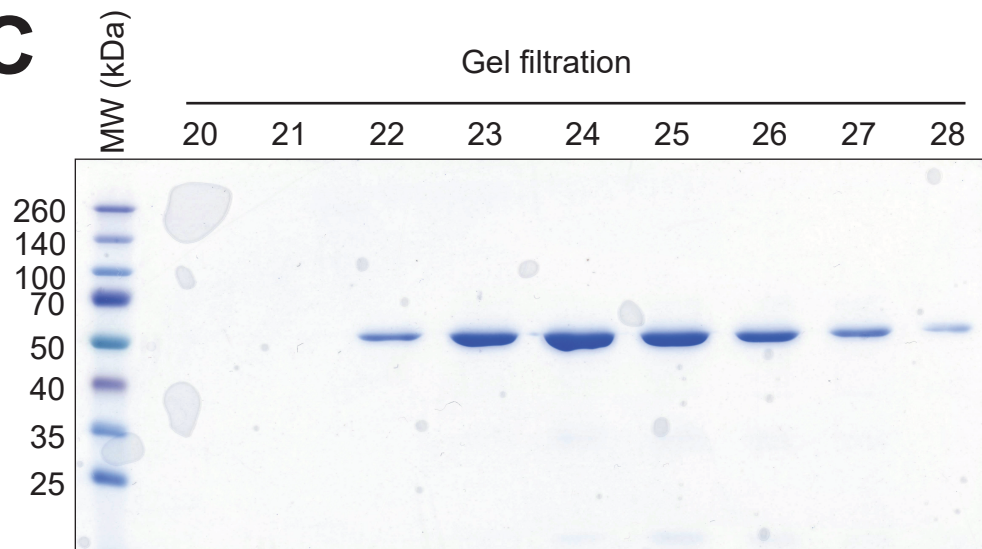

Supplement: pgen.1006847.s007.pdf [file pgen.1006847.s007.pdf]
