# Supplementary material for: Flipping chromosomes in deep-sea archaea
Source: PubMed Central journal article supplement (PMC5495485; doi:10.1371/journal.pgen.1006847), 2017-06-19

**A**

| <i>attB</i> deletion  | Dimerisation | Sequence                                                                                 | Plasmid |
|-----------------------|--------------|------------------------------------------------------------------------------------------|---------|
| Leu WT                | ND           | GCGGGGGTTGCCGAGCCTGGTCAAAGGCGGTGGACTCAAGATCCACTCCCGCAGGGGTTCGCGGGTTCAAATCCCCGCCCCCGCACCA | -       |
| Leu 43-88             | -            | CCACTCCCGCAGGGGTTCGCGGGTTCAAATCCCCGCCCCCGCACCA                                           | pJO425  |
| Leu 2-88              | +            | C GGGGGTTGCCGAGCCTGGTCAAAGGCGGTGGACTCAAGATCCACTCCCGCAGGGGTTCGCGGGTTCAAATCCCCGCCCCCGCACCA | pJO322  |
| Leu 2-82              | +            | CGGGGGTTGCCGAGCCTGGTCAAAGGCGGTGGACTCAAGATCCACTCCCGCAGGGGTTCGCGGGTTCAAATCCCCGCCCCC        | pMC435  |
| Leu 2-72              | +            | CGGGGGTTGCCGAGCCTGGTCAAAGGCGGTGGACTCAAGATCCACTCCCGCAGGGGTTCGCGGGTTCAAAT                  | pMC433  |
| Leu 2-61              | +            | CGGGGGTTGCCGAGCCTGGTCAAAGGCGGTGGACTCAAGATCCACTCCCGCAGGGGTTC                              | pMC431  |
| Leu 2-47              | +            | CGGGGGTTGCCGAGCCTGGTCAAAGGCGGTGGACTCAAGATCCACT                                           | pMC429  |
| Leu 2-45              | +            | CGGGGGTTGCCGAGCCTGGTCAAAGGCGGTGGACTCAAGATCCA                                             | pMC443  |
| Leu 2-44              | +            | CGGGGGTTGCCGAGCCTGGTCAAAGGCGGTGGACTCAAGATCC                                              | pMC449  |
| Leu 2-43              | -            | CGGGGGTTGCCGAGCCTGGTCAAAGGCGGTGGACTCAAGATC                                               | pMC441  |
| Leu 2-42- <i>attP</i> | -            | CGGGGGTTGCCGAGCCTGGTCAAAGGCGGTGGACTCAAGAT                                                | pJO421  |
| Leu 5-44              | -            | GGGTTGCCGAGCCTGGTCAAAGGCGGTGGACTCAAGATCC                                                 | pJO459  |
| Leu 8-44              | -            | TTGCCGAGCCTGGTCAAAGGCGGTGGACTCAAGATCC                                                    | pJO461  |
| Leu 12-44             | -            | CGAGCCTGGTCAAAGGCGGTGGACTCAAGATCC                                                        | pJO463  |
| Leu 17-44             | -            | CTGGTCAAAGGCGGTGGACTCAAGATCC                                                             | pJO465  |
| <i>attP</i>           |              | *****<br>CGGGGGTTGCCGAGCCTGGTCAAAGGCGGTGGACTCAAGAT                                       |         |

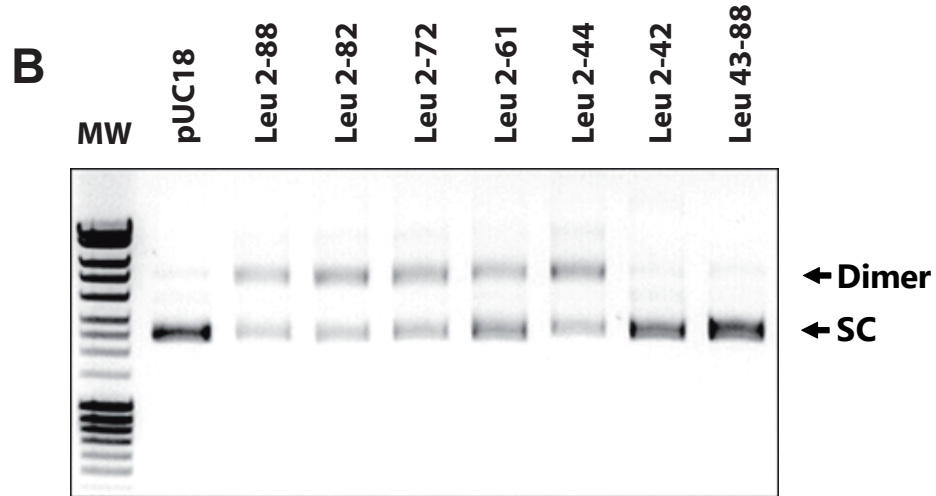

Supplement: pgen.1006847.s008.pdf [file pgen.1006847.s008.pdf]
