# Supplementary material for: Flipping chromosomes in deep-sea archaea
Source: PubMed Central journal article supplement (PMC5495485; doi:10.1371/journal.pgen.1006847), 2017-06-19
Supplement: pgen.1006847.s014.pdf [file pgen.1006847.s014.pdf]

>lac100

CACTGGCCGTCGTTTTACAACGTCGTGACTGGGAAAACCCTGGCGTTACC  
CAACTTAATCGCCTTGCAGCACATCCCCCTTTCGCCAGCTGGCGTAATAG

>lac175

CACTGGCCGTCGTTTTACAACGTCGTGACTGGGAAAACCCTGGCGTTACC  
CAACTTAATCGCCTTGCAGCACATCCCCCTTTCGCCAGCTGGCGTAATAG  
CGAAGAGGCCCGCACCGATCGCCCTTCCCAACAGTTGCGCAGCCTGAATG  
GCGAATGGCGCCTGATGCGGTATTT

>lac250

CACTGGCCGTCGTTTTACAACGTCGTGACTGGGAAAACCCTGGCGTTACC  
CAACTTAATCGCCTTGCAGCACATCCCCCTTTCGCCAGCTGGCGTAATAG  
CGAAGAGGCCCGCACCGATCGCCCTTCCCAACAGTTGCGCAGCCTGAATG  
GCGAATGGCGCCTGATGCGGTATTTTCCTTACGCATCTGTGCGGTATT  
TCACACCGCATATGGTGCACTCTCAGTACAATCTGCTCTGATGCCGCATA
